# Supplementary material
Source: Royal Society of Chemistry journal article supplement (doi:10.1039/d5im00385g)
Supplement: d5im00385g1.pdf [file d5im00385g1.pdf]

**Title: Recyclable Semi-EV Sulphur Cured Natural Rubber Elastomer Composites**

**Thomas Griggs<sup>1</sup>, Anureet Kaur<sup>1</sup>, Meet M. Fefar<sup>1</sup>, Keizo Akutagawa<sup>1</sup>, Ton Peijs<sup>2</sup>, Biqiong Chen<sup>3</sup>,  
James J. C. Busfield<sup>1</sup>.**

<sup>1</sup>School of Engineering and Materials Science, Queen Mary University of London, Mile End Road, London, E1 4NS, UK

<sup>2</sup>Centre for Polymer and Composite, WMG, University of Warwick, Coventry, CV4 7AL, UK

<sup>3</sup>Department of Chemistry, University of Liverpool, Crown Street, Liverpool, L69 7ZD, UK

Corresponding Author: James Busfield ([j.busfield@qmul.ac.uk](mailto:j.busfield@qmul.ac.uk))

**Supplementary Table 1:**  $t_{90}$  times for each unfilled formulation determined through MDR analysis at 150°C

|                | SEV Control | SEV CuMA-1/1 | SEV CuMA-1/2 | SEV CuMA-1/4 | SEV CuMa-1/8 | SEV CuMa-1/16 |
|----------------|-------------|--------------|--------------|--------------|--------------|---------------|
| $t_{90}$ / min | 10          | 9.6          | 7.7          | 8.3          | 7.4          | 7.7           |

**Supplementary Table 2:**  $t_{90}$  times for each filled formulation determined through MDR analysis at 150°C.

|                | SEV Control CB | SEV CuMA 1/16 CB |
|----------------|----------------|------------------|
| $t_{90}$ / min | 4.20           | 8.67             |

**Supplementary Table 3:** Cross-link density from equilibrium swelling of unfilled recycled compounds

|          | SEV Control                                   | SEV CuMA 1/16                                 | SEV CuMA 1/8                                  | SEV CuMA 1/4                                  |
|----------|-----------------------------------------------|-----------------------------------------------|-----------------------------------------------|-----------------------------------------------|
|          | $v_{phy} / \text{mol cm}^{-3}$                |
| Pristine | $1.95 \times 10^{-4} \pm 8.13 \times 10^{-6}$ | $1.61 \times 10^{-4} \pm 6.00 \times 10^{-7}$ | $1.66 \times 10^{-4} \pm 9.35 \times 10^{-7}$ | $1.60 \times 10^{-4} \pm 1.34 \times 10^{-6}$ |
| R90V10   | $2.20 \times 10^{-4} \pm 5.83 \times 10^{-6}$ | $1.91 \times 10^{-4} \pm 1.66 \times 10^{-6}$ | $1.98 \times 10^{-4} \pm 2.15 \times 10^{-6}$ | $1.80 \times 10^{-4} \pm 1.45 \times 10^{-6}$ |
| R80V20   | $2.15 \times 10^{-4} \pm 1.22 \times 10^{-5}$ | $1.83 \times 10^{-4} \pm 8.66 \times 10^{-7}$ | $1.93 \times 10^{-4} \pm 2.29 \times 10^{-6}$ | $1.71 \times 10^{-4} \pm 2.37 \times 10^{-6}$ |
| R70V30   | $2.00 \times 10^{-4} \pm 1.55 \times 10^{-6}$ | $1.78 \times 10^{-4} \pm 1.18 \times 10^{-6}$ | $1.67 \times 10^{-4} \pm 2.55 \times 10^{-7}$ | $1.68 \times 10^{-4} \pm 6.65 \times 10^{-7}$ |

**Supplementary Table 4:** Ultimate tensile stress and strain values of unfilled pristine and recycled compounds.

|          | SEV Control        |                | SEV CuMA 1/16      |                | SEV CuMA 1/8       |                | SEV CuMA 1/4       |                |
|----------|--------------------|----------------|--------------------|----------------|--------------------|----------------|--------------------|----------------|
|          | $\epsilon$ / mm/mm | $\sigma$ / MPa |
| Pristine | 14.5 ± 0.9         | 24.8 ± 3.8     | 11.8 ± 0.2         | 26.5 ± 0.7     | 11.7 ± 0.1         | 26.53 ± 0.7    | 11.9 ± 0.1         | 25.2 ± 2.1     |
| R90V10   | 1.5 ± 0.3          | 0.8 ± 0.2      | 6.1 ± 2.3          | 4.6 ± 2.4      | 5.2 ± 1.4          | 3.5 ± 1.2      | 8.1 ± 1.7          | 7.0 ± 2.4      |
| R80V20   | 3.9 ± 1.4          | 2.4 ± 0.8      | 7.9 ± 2.5          | 7.3 ± 3.6      | 5.4 ± 2.2          | 4.0 ± 2.5      | 7.2 ± 1.8          | 5.5 ± 2.3      |
| R70V30   | 6.6 ± 1.8          | 4.6 ± 1.8      | 8.2 ± 1.2          | 7.1 ± 1.8      | 6.3 ± 2.1          | 4.9 ± 2.5      | 8.4 ± 0.7          | 7.4 ± 1.1      |

**Supplementary Table 5:** Cross-link density from equilibrium swelling of filled recycled compounds

|          | SEV Control CB                                | SEV CuMA 1/16 CB                              |
|----------|-----------------------------------------------|-----------------------------------------------|
|          | $v_{phy}$ / mol cm <sup>-3</sup>              | $v_{phy}$ / mol cm <sup>-3</sup>              |
| Pristine | 2.27×10 <sup>-4</sup> ± 9.84×10 <sup>-6</sup> | 2.33×10 <sup>-4</sup> ± 4.62×10 <sup>-6</sup> |
| R50V50   | 1.87×10 <sup>-4</sup> ± 4.38×10 <sup>-6</sup> | 1.85×10 <sup>-4</sup> ± 1.55×10 <sup>-6</sup> |
| R90V10   | 2.16×10 <sup>-4</sup> ± 4.55×10 <sup>-6</sup> | 1.85×10 <sup>-4</sup> ± 6.39×10 <sup>-6</sup> |

**Supplementary Table 6:** Ultimate tensile stress and strain values of filled pristine and recycled compounds.

|          | SEV Control CB     |                | SEV CuMA 1/16 CB   |                |
|----------|--------------------|----------------|--------------------|----------------|
|          | $\epsilon$ / mm/mm | $\sigma$ / MPa | $\epsilon$ / mm/mm | $\sigma$ / MPa |
| Pristine | 6.7 ± 0.1          | 24.1 ± 0.5     | 5.9 ± 0.2          | 24.6 ± 0.6     |
| R50V50   | 4.2 ± 0.3          | 15.7 ± 1.4     | 5.8 ± 0.1          | 20.9 ± 0.7     |
| R90V10   | 3.3 ± 0.5          | 11.1 ± 1.5     | 5.9 ± 0.1          | 20.9 ± 0.6     |

**Supplementary Table 7:** Ultimate tensile stress and strain values of multiple recycling events

|                 | $\epsilon$ / mm/mm | $\sigma$ / MPa |
|-----------------|--------------------|----------------|
| Pristine        | 5.9 ± 0.2          | 24.6 ± 0.6     |
| 1 <sup>st</sup> | 5.8 ± 0.1          | 20.9 ± 0.7     |
| 2 <sup>nd</sup> | 6.1 ± 0.3          | 21.6 ± 0.6     |
| 3 <sup>rd</sup> | 6.0 ± 0.2          | 21.4 ± 1.1     |
| 4 <sup>th</sup> | 6.2 ± 0.1          | 22.6 ± 0.5     |

**Supplementary Table 8:** Cross-link density from equilibrium swelling of blended compound

| <i>SEV-Control-R50+CuMA-1/16-V50-CB</i> |                                               |
|-----------------------------------------|-----------------------------------------------|
|                                         | $v_{phy}$ / mol/g                             |
| Pristine                                | 2.27×10 <sup>-4</sup> ± 9.84×10 <sup>-6</sup> |
| R50V50                                  | 2.23×10 <sup>-4</sup> ± 1.94×10 <sup>-5</sup> |

**Supplementary Table 9:** Ultimate tensile stress and strain values of blended compound

**SEV-Control-R50+CuMA-1/16-V50-CB**

|                 | $\varepsilon$ / mm/mm | $\varepsilon$ / mm/mm |
|-----------------|-----------------------|-----------------------|
| <i>Pristine</i> | $6.7 \pm 0.1$         | $6.7 \pm 0.1$         |
| <i>R50V50</i>   | $6.4 \pm 0.1$         | $6.4 \pm 0.1$         |

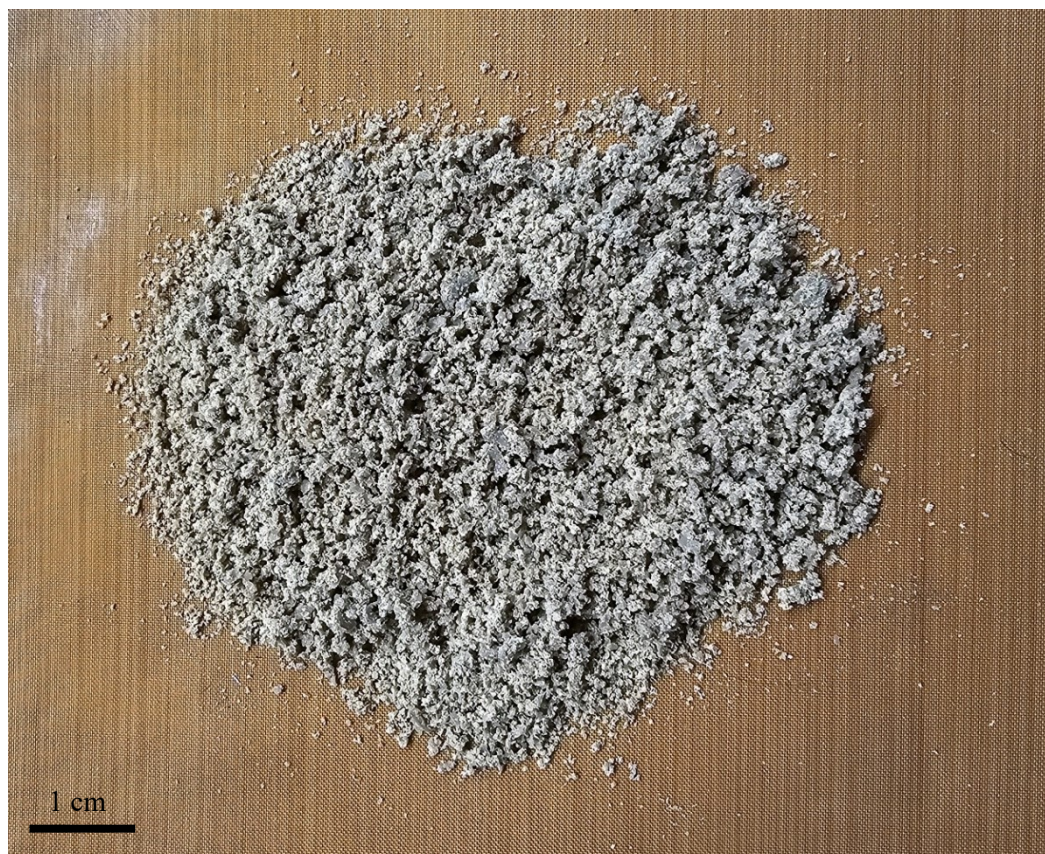

**Supplementary Figure 1:** Granulate achieved from describe methodology.
