# Supplementary material
Source: Royal Society of Chemistry journal article supplement (doi:10.1039/d5im00385g)
Supplement: d5im00385g4.pdf [file d5im00385g4.pdf]

Supplementary Information (SI) for Industrial Chemistry & Materials.

This journal is © Institute of Process Engineering of CAS 2026
