# Supplementary material
Source: Royal Society of Chemistry journal article supplement (doi:10.1039/d5im00385g)
Supplement: d5im00385g5.pdf [file d5im00385g5.pdf]

Supplementary Information (SI) for Industrial Chemistry & Materials.  
This journal is © Institute of Process Engineering of CAS 2026

|                 | SEV Control                                   | SEV CuMA 1/16                                 | SEV CuMA 1/8                                  | SEV CuMA 1/4                                  |
|-----------------|-----------------------------------------------|-----------------------------------------------|-----------------------------------------------|-----------------------------------------------|
|                 | $v_{\text{phy}} / \text{mol cm}^{-3}$         |
| <i>Pristine</i> | $1.95 \times 10^{-4} \pm 8.13 \times 10^{-6}$ | $1.61 \times 10^{-4} \pm 6.00 \times 10^{-7}$ | $1.66 \times 10^{-4} \pm 9.35 \times 10^{-7}$ | $1.60 \times 10^{-4} \pm 1.34 \times 10^{-6}$ |
| <i>R90V10</i>   | $2.20 \times 10^{-4} \pm 5.83 \times 10^{-6}$ | $1.91 \times 10^{-4} \pm 1.66 \times 10^{-6}$ | $1.98 \times 10^{-4} \pm 2.15 \times 10^{-6}$ | $1.80 \times 10^{-4} \pm 1.45 \times 10^{-6}$ |
| <i>R80V20</i>   | $2.15 \times 10^{-4} \pm 1.22 \times 10^{-5}$ | $1.83 \times 10^{-4} \pm 8.66 \times 10^{-7}$ | $1.93 \times 10^{-4} \pm 2.29 \times 10^{-6}$ | $1.71 \times 10^{-4} \pm 2.37 \times 10^{-6}$ |
| <i>R70V30</i>   | $2.00 \times 10^{-4} \pm 1.55 \times 10^{-6}$ | $1.78 \times 10^{-4} \pm 1.18 \times 10^{-6}$ | $1.67 \times 10^{-4} \pm 2.55 \times 10^{-7}$ | $1.68 \times 10^{-4} \pm 6.65 \times 10^{-7}$ |
