# Supplementary material
Source: Royal Society of Chemistry journal article supplement (doi:10.1039/d5im00385g)
Supplement: d5im00385g6.pdf [file d5im00385g6.pdf]

# Supplementary Information (SI) for Industrial Chemistry & Materials.

This journal is © Institute of Process Engineering of CAS 2026

|          | SEV Control           |                | SEV CuMA 1/16         |                | SEV CuMA 1/8          |                | SEV CuMA 1/4          |                |
|----------|-----------------------|----------------|-----------------------|----------------|-----------------------|----------------|-----------------------|----------------|
|          | $\varepsilon$ / mm/mm | $\sigma$ / MPa |
| Pristine | 14.5 ± 0.9            | 24.8 ± 3.8     | 11.8 ± 0.2            | 26.5 ± 0.7     | 11.7 ± 0.1            | 26.53 ± 0.7    | 11.9 ± 0.1            | 25.2 ± 2.1     |
| R90V10   | 1.5 ± 0.3             | 0.8 ± 0.2      | 6.1 ± 2.3             | 4.6 ± 2.4      | 5.2 ± 1.4             | 3.5 ± 1.2      | 8.1 ± 1.7             | 7.0 ± 2.4      |
| R80V20   | 3.9 ± 1.4             | 2.4 ± 0.8      | 7.9 ± 2.5             | 7.3 ± 3.6      | 5.4 ± 2.2             | 4.0 ± 2.5      | 7.2 ± 1.8             | 5.5 ± 2.3      |
| R70V30   | 6.6 ± 1.8             | 4.6 ± 1.8      | 8.2 ± 1.2             | 7.1 ± 1.8      | 6.3 ± 2.1             | 4.9 ± 2.5      | 8.4 ± 0.7             | 7.4 ± 1.1      |
