# Supplementary material
Source: Royal Society of Chemistry journal article supplement (doi:10.1039/d5im00385g)
Supplement: d5im00385g7.pdf [file d5im00385g7.pdf]

|                 | <b>SEV Control CB</b>                                     | <b>SEV CuMA 1/16 CB</b>                                   |
|-----------------|-----------------------------------------------------------|-----------------------------------------------------------|
|                 | $v_{\text{phy}} / \underline{\text{mol}} \text{ cm}^{-3}$ | $v_{\text{phy}} / \underline{\text{mol}} \text{ cm}^{-3}$ |
| <i>Pristine</i> | $2.27 \times 10^{-4} \pm 9.84 \times 10^{-6}$             | $2.33 \times 10^{-4} \pm 4.62 \times 10^{-6}$             |
| <i>R50V50</i>   | $1.87 \times 10^{-4} \pm 4.38 \times 10^{-6}$             | $1.85 \times 10^{-4} \pm 1.55 \times 10^{-6}$             |
| <i>R90V10</i>   | $2.16 \times 10^{-4} \pm 4.55 \times 10^{-6}$             | $1.85 \times 10^{-4} \pm 6.39 \times 10^{-6}$             |
