# Supplementary material
Source: Royal Society of Chemistry journal article supplement (doi:10.1039/d5im00385g)
Supplement: d5im00385g8.pdf [file d5im00385g8.pdf]

|                 | <b>SEV Control CB</b> |                | <b>SEV CuMA 1/16 CB</b> |                |
|-----------------|-----------------------|----------------|-------------------------|----------------|
|                 | $\varepsilon$ / mm/mm | $\sigma$ / MPa | $\varepsilon$ / mm/mm   | $\sigma$ / MPa |
| <i>Pristine</i> | $6.7 \pm 0.1$         | $24.1 \pm 0.5$ | $5.9 \pm 0.2$           | $24.6 \pm 0.6$ |
| <i>R50V50</i>   | $4.2 \pm 0.3$         | $15.7 \pm 1.4$ | $5.8 \pm 0.1$           | $20.9 \pm 0.7$ |
| <i>R90V10</i>   | $3.3 \pm 0.5$         | $11.1 \pm 1.5$ | $5.9 \pm 0.1$           | $20.9 \pm 0.6$ |
