# Supplementary material
Source: Royal Society of Chemistry journal article supplement (doi:10.1039/d5im00385g)
Supplement: d5im00385g9.pdf [file d5im00385g9.pdf]

|                 | $\varepsilon$ / mm/mm | $\sigma$ / MPa |
|-----------------|-----------------------|----------------|
| <i>Pristine</i> | $5.9 \pm 0.2$         | $24.6 \pm 0.6$ |
| <i>1st</i>      | $5.8 \pm 0.1$         | $20.9 \pm 0.7$ |
| <i>2nd</i>      | $6.1 \pm 0.3$         | $21.6 \pm 0.6$ |
| <i>3rd</i>      | $6.0 \pm 0.2$         | $21.4 \pm 1.1$ |
| <i>4th</i>      | $6.2 \pm 0.1$         | $22.6 \pm 0.5$ |
