# Supplementary material
Source: Royal Society of Chemistry journal article supplement (doi:10.1039/d5im00385g)
Supplement: d5im00385g10.pdf [file d5im00385g10.pdf]

*SEV-Control-R50+CuMA-1/16-V50-CB*

|                 | $v_{\text{phy}} / \text{mol/g}$               |
|-----------------|-----------------------------------------------|
| <i>Pristine</i> | $2.27 \times 10^{-4} \pm 9.84 \times 10^{-6}$ |
| <i>R50V50</i>   | $2.23 \times 10^{-4} \pm 1.94 \times 10^{-5}$ |
