# Supplementary material
Source: Royal Society of Chemistry journal article supplement (doi:10.1039/d5im00385g)
Supplement: d5im00385g11.pdf [file d5im00385g11.pdf]

**SEV-Control-R50+CuMA-1/16-V50-CB**

|                 | $\epsilon$ / mm/mm | $\epsilon$ / mm/mm |
|-----------------|--------------------|--------------------|
| <i>Pristine</i> | $6.7 \pm 0.1$      | $6.7 \pm 0.1$      |
| <i>R50V50</i>   | $6.4 \pm 0.1$      | $6.4 \pm 0.1$      |
