# Supplementary material
Source: Royal Society of Chemistry journal article supplement (doi:10.1039/d5im00385g)

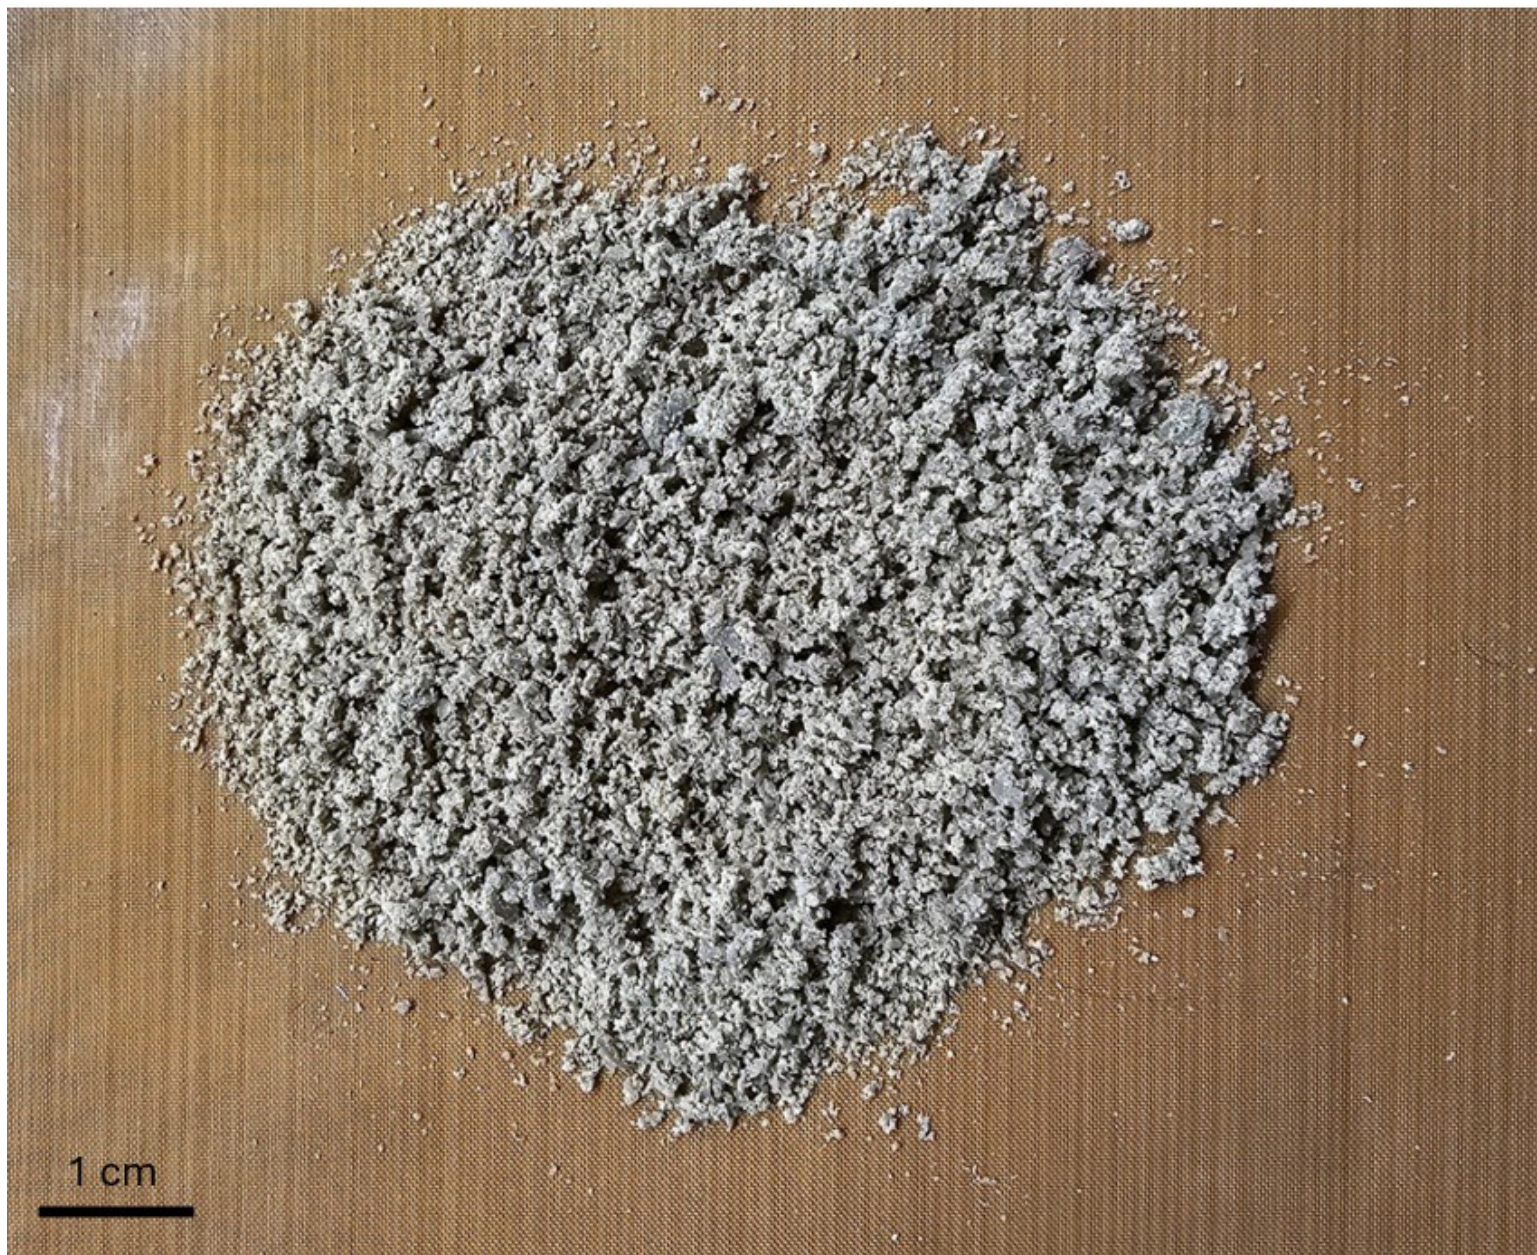

Supplement: d5im00385g2.pdf [file d5im00385g2.pdf]
